# Supplementary material for: Tamoxifen reduces mitochondrial respiration, oncogenic signaling and mutant allele burden in a myeloproliferative neoplasm subset
Source: Research Square preprint supplement (doi:10.21203/rs.3.rs-2687765/v1), 2023-03-30
Supplement: Supplementary file 1 [file 3cb2e1e1fd373b3262d4b903.xlsx]

## Sheet: Demographics and allele burden
TNO	Gender	Age (yr)	Disease	Driver mutation	Allele burden
					0w (%)	12w (% change)	24w (% change)
1	M	50	ET	CALR INS 5	97	17	-9
2	M	77	PMF	JAK2 V617F	100	17	2
3	M	65	ET	JAK2 V617F	89	0	-1
4	F	60	ET	CALR INS 5	47	19	-34
5	F	68	ET	JAK2 V617F	78	9	13
6	M	70	ET	CALR INS 5	31	-9	-2
7	M	64	ET	JAK2 V617F	34	-41	-85
8	M	75	PV	JAK2 V617F	41	28	-55
9	M	62	PV	JAK2 V617F	66	-12	24
10	M	77	PV-MF	JAK2 V617F	52	4	-14
11	M	66	ET	JAK2 V617F	21	0	-2
12	M	87	ET	JAK2 V617F	42	-26	14
13	M	55	PV	JAK2 V617F	27	33	-75
14	M	68	ET-MF	CALR INS 5	38	-17
15	M	56	PV-MF	JAK2 V617F	92	66	-18
16	M	77	PV-MF	JAK2 V617F	53	-20	-16
17	M	75	PV-MF	JAK2 V617F	90	1	8
18	F	75	PV	JAK2 V617F	28	22	37
19	F	75	ET	JAK2 V617F	30	-25	-35
20	F	64	PV	JAK2 V617F	29	9	-3
21	M	63	PMF	JAK2 V617F	27	3	-6
22	F	62	ET	CALR INS 5	41	-5
23	M	67	PV-MF	JAK2 V617F	92	1	0
24	M	56	ET	JAK2 V617F	47	-20	-15
25	M	65	ET	CALR DEL 52	30	-8	-26
26	F	74	PV	JAK2 V617F	44	-15	-4
27	F	74	PMF	CALR DEL 52	31		-7
28	F	63	ET	CALR DEL 52	54	-6	-16
29	M	73	PV	JAK2 V617F	25	4	-3
30	F	68	ET	JAK2 V617F	58	-23
31	M	68	ET-MF	CALR DEL 52	47
32	M	61	PV	JAK2 V617F	82	-35	-42
33	M	53	PV	JAK2 V617F	32	-48
34	M	59	PV	JAK2 V617F	24
35	F	67	PMF	JAK2 V617F	37	-18	-25
36	M	56	PMF	CALR DEL 52	53	-5	-18
37	M	62	PV	JAK2 V617F	45	-71	-13
38	M	64	PMF	JAK2 V617F	54	-13	-4

## Sheet: Discontinuation
Number of patients (frequency in brackets) that discontinued treatment in the course of Study, and reasons for discontinuation
Time on treatment, weeks	No trt. (1)	<12 (2)	12-23 (3)	24-35 (23)	36-47 (3)	48+ (6)	Overall (38)
Reason for discontinuation
Thrombotic event	0 (0.0)	0 (0.0)	1 (33.3)	0 (0.0)	0 (0.0)	0 (0.0)	1 (2.6)
Other toxicity	0 (0.0)	2 (100.0)	0 (0.0)	0 (0.0)	0 (0.0)	0 (0.0)	2 (5.3)
Lack of response (allele burden)	0 (0.0)	0 (0.0)	0 (0.0)	17 (73.9)	2 (66.7)	0 (0.0)	19 (50.0)
Other reason	0 (0.0)	0 (0.0)	0 (0.0)	1 (4.3)	0 (0.0)	2 (33.3)	3 (7.9)
Other reason selected but no details given	1 (100.0)	0 (0.0)	0 (0.0)	1 (4.3)	0 (0.0)	0 (0.0)	2 (5.3)
Symptoms/side effects/toxicities	0 (0.0)	0 (0.0)	0 (0.0)	2 (8.7)	0 (0.0)	1 (16.7)	3 (7.9)
No reason given	0 (0.0)	0 (0.0)	0 (0.0)	0 (0.0)	0 (0.0)	2 (33.3)	2 (5.3)
Withdrew consent; Other toxicity	0 (0.0)	0 (0.0)	0 (0.0)	1 (4.3)	0 (0.0)	0 (0.0)	1 (2.6)
Unacceptable toxicity; Symptoms/side effects/toxicities	0 (0.0)	0 (0.0)	1 (33.3)	0 (0.0)	0 (0.0)	0 (0.0)	1 (2.6)
Other toxicity; Symptoms/side effects/toxicities	0 (0.0)	0 (0.0)	1 (33.3)	0 (0.0)	1 (33.3)	1 (16.7)	3 (7.9)
Withdrew consent; Other toxicity; Lack of response (allele burden); Symptoms/side effects/toxicities	0 (0.0)	0 (0.0)	0 (0.0)	1 (4.3)	0 (0.0)	0 (0.0)	1 (2.6)
Total	1 (100.0)	2 (100.0)	3 (100.0)	23 (100.0)	3 (100.0)	6 (100.0)	38 (100.0)

## Sheet: Adverse events
Overview of Adverse Events
Events (patients; %)	ET	PV	PMF	PET-MF	PPV-MF
Any grade	59 (14; 100.0)	74 (9; 81.8)	33 (5; 83.3)	15 (2; 100.0)	22 (5; 100.0)
Grade1	43 (13; 92.9)	61 (8; 72.7)	28 (5; 83.3)	12 (2; 100.0)	18 (5; 100.0)
Grade2	15 (8; 57.1)	14 (5; 45.5)	5 (4; 66.7)	3 (2; 100.0)	4 (3; 60.0)
Grade3	1 (1; 7.1)	1 (1; 9.1)	0 (0; 0.0)	0 (0; 0.0)	0 (0; 0.0)
Grade4	0 (0; 0.0)	0 (0; 0.0)	0 (0; 0.0)	0 (0; 0.0)	0 (0; 0.0)
Grade5	0 (0; 0.0)	0 (0; 0.0)	0 (0; 0.0)	0 (0; 0.0)	0 (0; 0.0)
Possibly/probably/definitely related to tamoxifen	20 (7; 50.0)	27 (6; 54.5)	13 (5; 83.3)	1 (1; 50.0)	5 (3; 60.0)

## Sheet: Toxicities
Toxicities experienced by grade, ordered according to most frequently occurring
Toxicity	Grade1	Grade2	Grade3	Grade4	Any Grade
Fatigue	6 (4)	4 (0)	0 (0)	0 (0)	10 (4)
Infections and infestations - Other	3 (1)	6 (1)	0 (0)	0 (0)	9 (2)
Skin and subcutaneous tissue disorders - Other	5 (2)	3 (1)	0 (0)	0 (0)	8 (3)
Nausea	7 (2)	1 (1)	0 (0)	0 (0)	8 (3)
Musculoskeletal and connective tissue disorder - Other	4 (2)	4 (0)	0 (0)	0 (0)	8 (2)
Hot flashes	6 (6)	1 (1)	0 (0)	0 (0)	7 (7)
General disorders and administration site conditions - Other	5 (3)	1 (1)	0 (0)	0 (0)	6 (4)
Headache	5 (2)	1 (1)	0 (0)	0 (0)	6 (3)
Gastrointestinal disorders - Other	6 (0)	0 (0)	0 (0)	0 (0)	6 (0)
Arthralgia	5 (0)	0 (0)	0 (0)	0 (0)	5 (0)
Epistaxis	4 (0)	0 (0)	0 (0)	0 (0)	4 (0)
Metabolism and nutrition disorders - Other	3 (3)	0 (0)	0 (0)	0 (0)	3 (3)
Libido decreased	3 (2)	0 (0)	0 (0)	0 (0)	3 (2)
Pruritus	2 (1)	1 (0)	0 (0)	0 (0)	3 (1)
Flu like symptoms	3 (1)	0 (0)	0 (0)	0 (0)	3 (1)
Pain in extremity	3 (1)	0 (0)	0 (0)	0 (0)	3 (1)
Insomnia	3 (1)	0 (0)	0 (0)	0 (0)	3 (1)
Abdominal pain	2 (0)	1 (0)	0 (0)	0 (0)	3 (0)
Respiratory, thoracic and mediastinal disorders - Other	2 (0)	1 (0)	0 (0)	0 (0)	3 (0)
Sore throat	3 (0)	0 (0)	0 (0)	0 (0)	3 (0)
Urinary tract infection	0 (0)	1 (1)	1 (0)	0 (0)	2 (1)
Rash pustular	1 (0)	1 (1)	0 (0)	0 (0)	2 (1)
Bone pain	1 (0)	1 (1)	0 (0)	0 (0)	2 (1)
Mucositis oral	2 (1)	0 (0)	0 (0)	0 (0)	2 (1)
Dizziness	2 (1)	0 (0)	0 (0)	0 (0)	2 (1)
Alopecia	2 (1)	0 (0)	0 (0)	0 (0)	2 (1)
Dry skin	2 (1)	0 (0)	0 (0)	0 (0)	2 (1)
Investigations - Other	0 (0)	2 (0)	0 (0)	0 (0)	2 (0)
Dyspnea	0 (0)	2 (0)	0 (0)	0 (0)	2 (0)
Upper respiratory infection	2 (0)	0 (0)	0 (0)	0 (0)	2 (0)
Back pain	2 (0)	0 (0)	0 (0)	0 (0)	2 (0)
Nervous system disorders - Other	2 (0)	0 (0)	0 (0)	0 (0)	2 (0)
Cough	2 (0)	0 (0)	0 (0)	0 (0)	2 (0)
Vascular disorders - Other	2 (0)	0 (0)	0 (0)	0 (0)	2 (0)
Mucosal infection	0 (0)	1 (1)	0 (0)	0 (0)	1 (1)
Alanine aminotransferase increased	0 (0)	1 (1)	0 (0)	0 (0)	1 (1)
Lymphedema	0 (0)	1 (1)	0 (0)	0 (0)	1 (1)
Superficial thrombophlebitis	0 (0)	1 (1)	0 (0)	0 (0)	1 (1)
Flashing lights	1 (1)	0 (0)	0 (0)	0 (0)	1 (1)
Eye disorders - Other	1 (1)	0 (0)	0 (0)	0 (0)	1 (1)
Oral pain	1 (1)	0 (0)	0 (0)	0 (0)	1 (1)
Skin infection	1 (1)	0 (0)	0 (0)	0 (0)	1 (1)
Cholesterol high	1 (1)	0 (0)	0 (0)	0 (0)	1 (1)
Generalized muscle weakness	1 (1)	0 (0)	0 (0)	0 (0)	1 (1)
Peripheral sensory neuropathy	1 (1)	0 (0)	0 (0)	0 (0)	1 (1)
Agitation	1 (1)	0 (0)	0 (0)	0 (0)	1 (1)
Urinary frequency	1 (1)	0 (0)	0 (0)	0 (0)	1 (1)
Urinary tract pain	1 (1)	0 (0)	0 (0)	0 (0)	1 (1)
Vaginal dryness	1 (1)	0 (0)	0 (0)	0 (0)	1 (1)
Rash acneiform	1 (1)	0 (0)	0 (0)	0 (0)	1 (1)
Flushing	1 (1)	0 (0)	0 (0)	0 (0)	1 (1)
Skin ulceration	0 (0)	0 (0)	1 (0)	0 (0)	1 (0)
Blood and lymphatic system disorders - Other	0 (0)	1 (0)	0 (0)	0 (0)	1 (0)
Palpitations	0 (0)	1 (0)	0 (0)	0 (0)	1 (0)
Retinal detachment	0 (0)	1 (0)	0 (0)	0 (0)	1 (0)
Eye infection	0 (0)	1 (0)	0 (0)	0 (0)	1 (0)
Memory impairment	0 (0)	1 (0)	0 (0)	0 (0)	1 (0)
Wheezing	0 (0)	1 (0)	0 (0)	0 (0)	1 (0)
Cardiac disorders - Other	1 (0)	0 (0)	0 (0)	0 (0)	1 (0)
Ear pain	1 (0)	0 (0)	0 (0)	0 (0)	1 (0)
Tinnitus	1 (0)	0 (0)	0 (0)	0 (0)	1 (0)
Ear and labyrinth disorders - Other	1 (0)	0 (0)	0 (0)	0 (0)	1 (0)
Blurred vision	1 (0)	0 (0)	0 (0)	0 (0)	1 (0)
Eye pain	1 (0)	0 (0)	0 (0)	0 (0)	1 (0)
Abdominal distension	1 (0)	0 (0)	0 (0)	0 (0)	1 (0)
Constipation	1 (0)	0 (0)	0 (0)	0 (0)	1 (0)
Diarrhea	1 (0)	0 (0)	0 (0)	0 (0)	1 (0)
Flatulence	1 (0)	0 (0)	0 (0)	0 (0)	1 (0)
Vomiting	1 (0)	0 (0)	0 (0)	0 (0)	1 (0)
Chills	1 (0)	0 (0)	0 (0)	0 (0)	1 (0)
Non-cardiac chest pain	1 (0)	0 (0)	0 (0)	0 (0)	1 (0)
Pain	1 (0)	0 (0)	0 (0)	0 (0)	1 (0)
Hepatic pain	1 (0)	0 (0)	0 (0)	0 (0)	1 (0)
Bruising	1 (0)	0 (0)	0 (0)	0 (0)	1 (0)
Weight loss	1 (0)	0 (0)	0 (0)	0 (0)	1 (0)
Hypertriglyceridemia	1 (0)	0 (0)	0 (0)	0 (0)	1 (0)
Myalgia	1 (0)	0 (0)	0 (0)	0 (0)	1 (0)
Neck pain	1 (0)	0 (0)	0 (0)	0 (0)	1 (0)
Lethargy	1 (0)	0 (0)	0 (0)	0 (0)	1 (0)
Paresthesia	1 (0)	0 (0)	0 (0)	0 (0)	1 (0)
Vaginal discharge	1 (0)	0 (0)	0 (0)	0 (0)	1 (0)
Reproductive system and breast disorders - Other	1 (0)	0 (0)	0 (0)	0 (0)	1 (0)
Nasal congestion	1 (0)	0 (0)	0 (0)	0 (0)	1 (0)
Pleuritic pain	1 (0)	0 (0)	0 (0)	0 (0)	1 (0)
Rash maculo-papular	1 (0)	0 (0)	0 (0)	0 (0)	1 (0)
The brackets contain the number of potentially related AEs for that toxicity. GradeNK: Grade is missing
